# Supplementary material for: A Comparison between Triphenylmethyl and Triphenylsilyl Spirobifluorenyl Hosts: Synthesis, Photophysics and Performance in Phosphorescent Organic Light-Emitting Diodes
Source: MDPI journal article supplement (doi:10.3390/molecules28135241), 2023-07-06
Supplement: s1 [file s1]

# Supporting Information

for

## A Comparison between Triphenylmethyl and Triphenylsilyl Spirobifluorenyl Hosts: Synthesis, Photophysics and Performance in Phosphorescent Organic Light-Emitting Diodes

Wei Wei <sup>1,†</sup>, Jie Ma <sup>2,†</sup>, Jonas Schaab <sup>1</sup>, Jason Brooks <sup>3</sup>, Seogshin Kang <sup>1</sup>, Matthew T. Whited <sup>1</sup>, Peter I. Djurovich <sup>1</sup> and Mark E. Thompson <sup>1,2,\*</sup>

<sup>1</sup> Department of Chemistry, University of Southern California, Los Angeles, CA 90089, USA

<sup>2</sup> Mork Family Department of Chemical Engineering and Materials Science, University of Southern California, Los Angeles, CA 90089, USA

<sup>3</sup> Universal Display Corporation, Ewing, NJ 08618, USA

\* Correspondence: met@usc.edu

† These authors contributed equally to this work.

## Table of Contents

|                                                                                                                                                                    |   |
|--------------------------------------------------------------------------------------------------------------------------------------------------------------------|---|
| Table of Contents                                                                                                                                                  | 1 |
| Table S1: Crystallographic Data for <b>SB-C</b> and <b>SB-Si</b>                                                                                                   | 3 |
| Figure S1. Packing of <b>SB-C</b> (top) and <b>SB-Si</b> (bottom) molecules in a unit cell                                                                         | 4 |
| Figure S2. Calculated Hirshfeld surfaces of <b>SB-C</b> and <b>SB-Si</b> , which are shown in different viewing angles (front, left and back)                      | 5 |
| Figure S3. DFT calculated HOMO (solid) and LUMO (mesh) surface and levels of <b>SB-C</b> and <b>SB-Si</b> . Calculated values are compared to the measured values. | 6 |
| Figure S4. (a) Cyclic voltammetry curves of <b>SB-Si</b> and <b>SB-C</b> . (b) Differential pulse voltammetry curves of <b>SB-Si</b> and <b>SB-C</b> .             | 7 |
| Figure S5. Differential scanning calorimetric (DSC) thermograms of <b>SB-Si</b> and <b>SB-C</b>                                                                    | 8 |
| Figure S6. Voltage dependence of EL spectra of the undoped devices.                                                                                                | 9 |

Table S1: Crystallographic Data for **SB-C** and **SB-Si**.

| Identification Code                       | SB-C                                                             | SB-Si                                                            |
|-------------------------------------------|------------------------------------------------------------------|------------------------------------------------------------------|
| Empirical formula                         | C <sub>44</sub> H <sub>30</sub>                                  | C <sub>43</sub> H <sub>30</sub> Si                               |
| Formula weight                            | 558.68                                                           | 574.76                                                           |
| Temperature/K                             | 101(1)                                                           | 102(2)                                                           |
| Crystal system                            | Monoclinic                                                       | monoclinic                                                       |
| Space group                               | P2 <sub>1</sub> /n                                               | P2 <sub>1</sub> /n                                               |
| a/Å                                       | 13.2736(3)                                                       | 13.54470(12)                                                     |
| b/Å                                       | 9.03871(19)                                                      | 9.29422(8)                                                       |
| c/Å                                       | 24.5142(6)                                                       | 24.5334(2)                                                       |
| $\alpha$ /°                               | 90                                                               | 90                                                               |
| $\beta$ /°                                | 91.929(2)                                                        | 91.1600(8)                                                       |
| $\gamma$ /°                               | 90                                                               | 90                                                               |
| Volume/Å <sup>3</sup>                     | 2939.45(11)                                                      | 3087.81(5)                                                       |
| Z                                         | 4                                                                | 4                                                                |
| $\rho_{\text{calc}}/\text{cm}^3$          | 1.262                                                            | 1.236                                                            |
| $\mu/\text{mm}^1$                         | 0.541                                                            | 0.888                                                            |
| F(000)                                    | 1176.0                                                           | 1208.0                                                           |
| Crystal size/mm <sup>3</sup>              | 0.164 × 0.11 × 0.039                                             | 0.576 × 0.201 × 0.1                                              |
| Radiation                                 | Cu K $\alpha$ ( $\lambda$ = 1.54184)                             | Cu K $\alpha$ ( $\lambda$ = 1.54184)                             |
| 2 $\theta$ range for data collection/°    | 7.216 to 160.454                                                 | 7.208 to 160.704                                                 |
| Index ranges                              | -16 ≤ h ≤ 16, -11 ≤ k ≤ 7,<br>-31 ≤ l ≤ 30                       | -17 ≤ h ≤ 16, -8 ≤ k ≤ 11,<br>-31 ≤ l ≤ 31                       |
| Reflections collected                     | 23585                                                            | 49890                                                            |
| Independent reflections                   | 6180<br>[R <sub>int</sub> = 0.0386, R <sub>sigma</sub> = 0.0349] | 6740<br>[R <sub>int</sub> = 0.0498, R <sub>sigma</sub> = 0.0289] |
| Data/restraints/parameters                | 6180/0/398                                                       | 6740/0/398                                                       |
| Goodness-of-fit on F <sup>2</sup>         | 1.051                                                            | 1.057                                                            |
| Final R indexes [I ≥ 2 $\sigma$ (I)]      | R <sub>1</sub> = 0.0408, wR <sub>2</sub> = 0.1035                | R <sub>1</sub> = 0.0390, wR <sub>2</sub> = 0.1011                |
| Final R indexes [all data]                | R <sub>1</sub> = 0.0489, wR <sub>2</sub> = 0.1078                | R <sub>1</sub> = 0.0418, wR <sub>2</sub> = 0.1032                |
| Largest diff. peak/hole/e Å <sup>-3</sup> | 0.30/-0.21                                                       | 0.45/-0.35                                                       |
| #CCDC                                     | 2221201                                                          | 2216982                                                          |

### SB-C Unit Cell

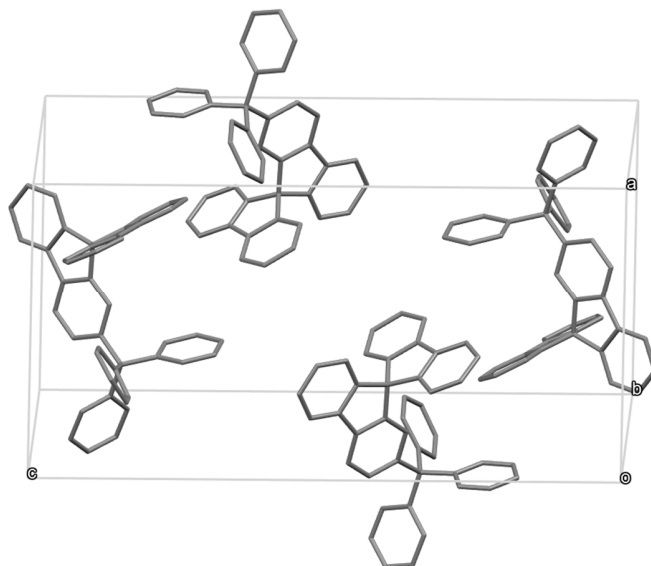

### SB-Si Unit Cell

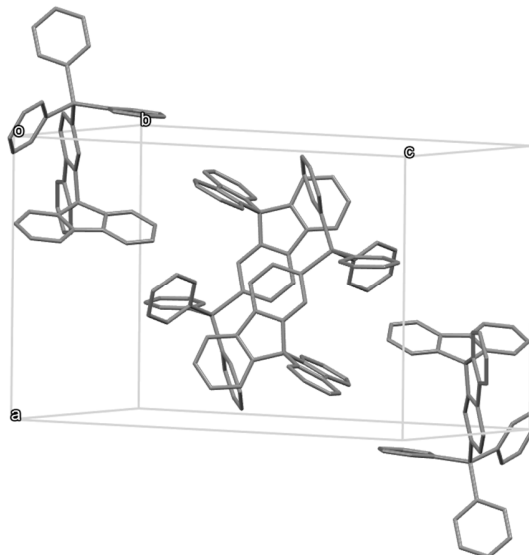

Figure S1. Packing of **SB-C** (top) and **SB-Si** (bottom) molecules in a unit cell.

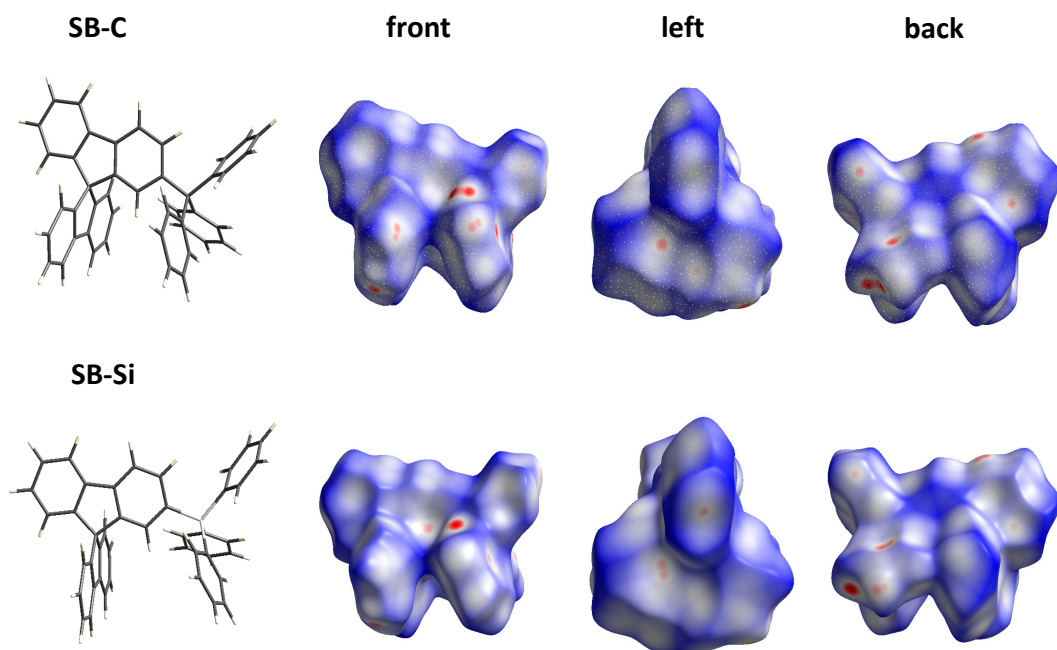

Figure S2. Calculated Hirshfeld surfaces of **SB-C** and **SB-Si**, which are shown in different viewing angles (front, left and back).

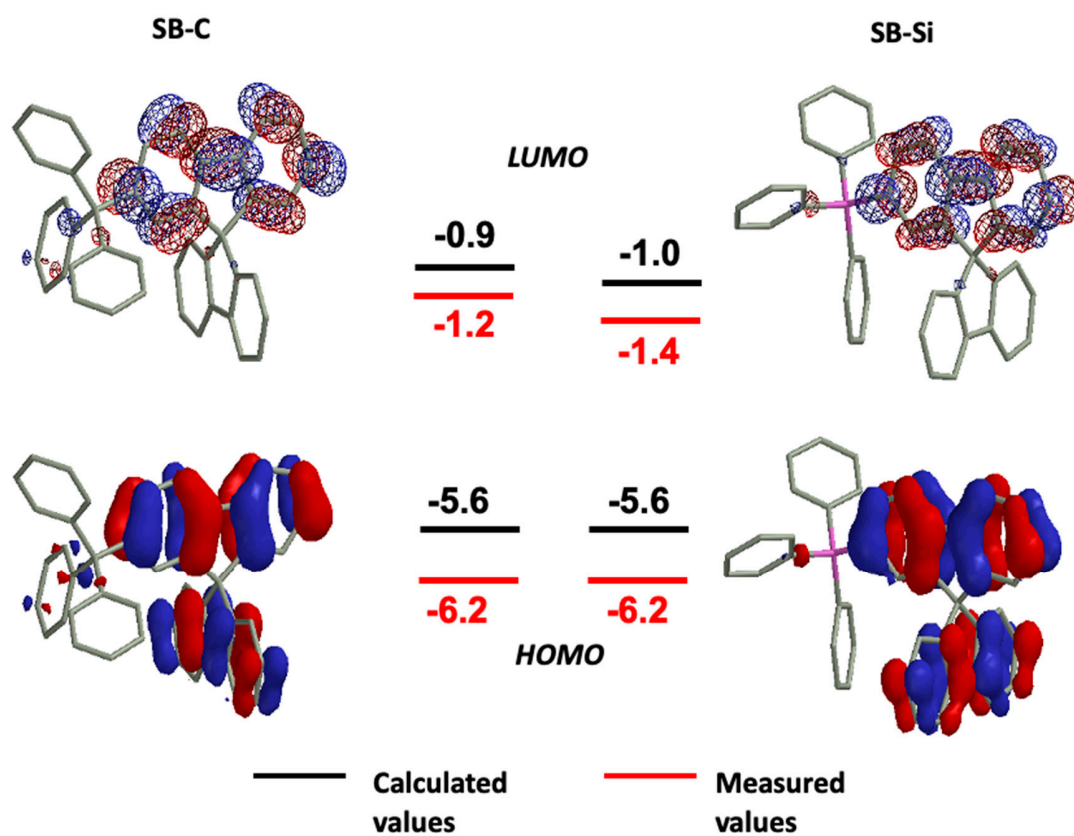

Figure S3. DFT calculated HOMO (solid) and LUMO (mesh) surface and levels of **SB-C** and **SB-Si**. Calculated values are compared to the measured values.

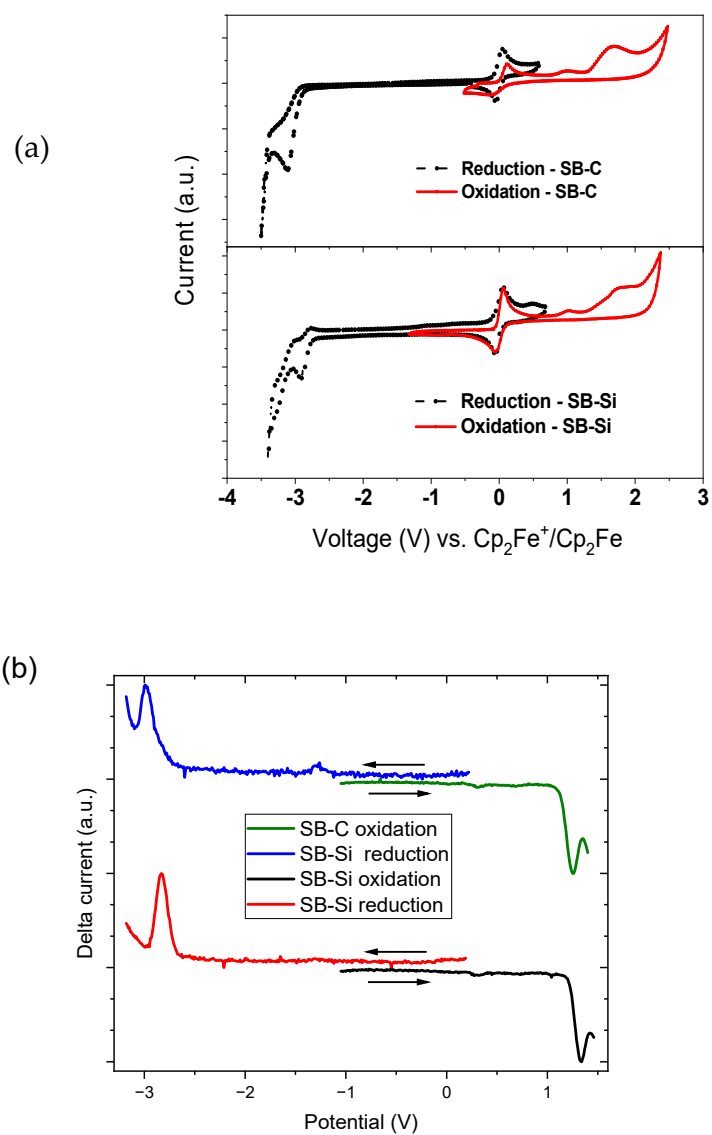

Figure S4. (a) Cyclic voltammetry and differential pulse voltammetry, (b), curves for **SB-Si** and **SB-C**.

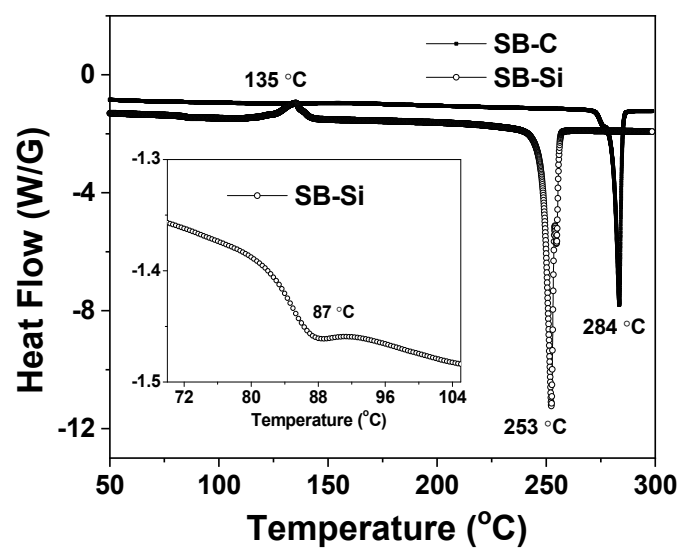

Figure S5. Differential scanning calorimetric (DSC) thermograms of **SB-Si** and **SB-C**.



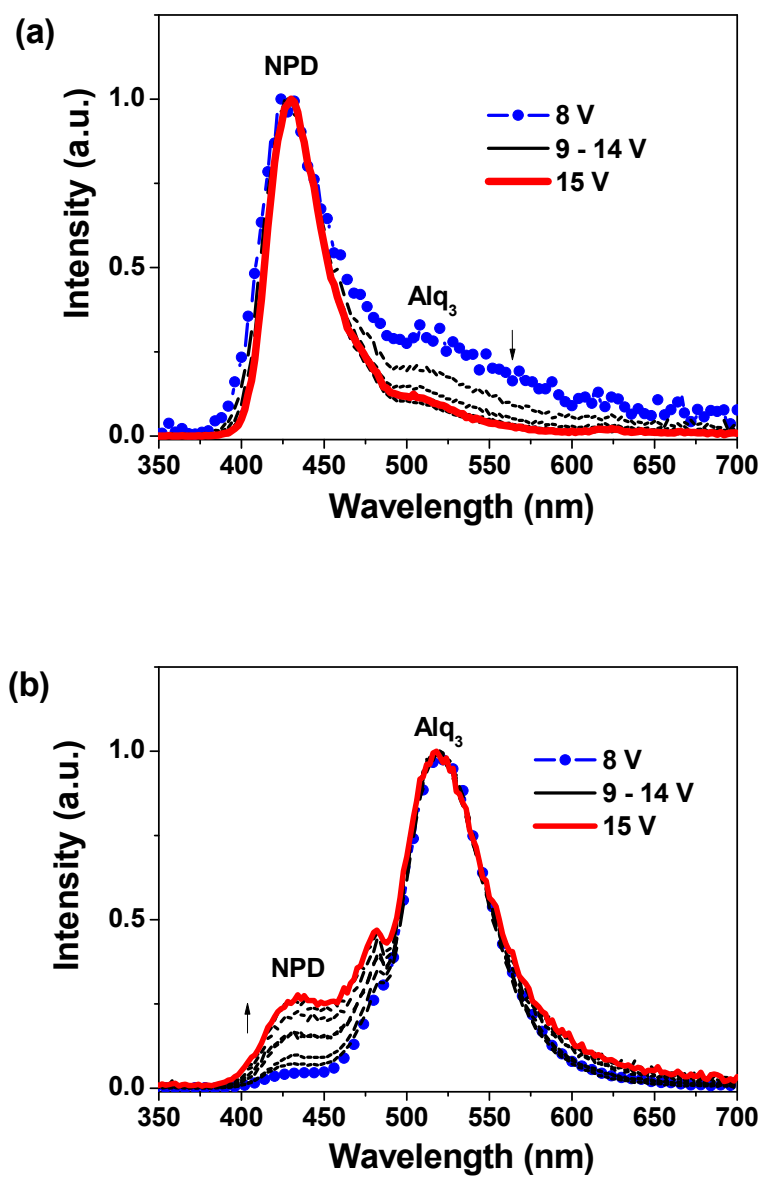

Figure S6. (a,b) Voltage dependence of EL spectra of the undoped devices.
